# Supplementary material for: Risk factors for reoperation and treatment strategies following repair of esophageal atresia
Source: Research Square preprint supplement (doi:10.21203/rs.3.rs-7331546/v1), 2025-08-27
Supplement: Supplementary file 1 [file 0d3a52d22d35103ffc99771f.xlsx]

## Sheet: Table 1
Table 1 Details of cases in reoperation group
No.	Sex	Gestational age (week)	Birth weght (g)	Associated anomalies	Gross type	Gap (cm)	First esophageal repair			Postoperative complications					Reoperation for esophagus			Neurodevelopmental delay
							Age (day)	BW (kg)	Type of esophageal repair	Diagnosis	Age at diagnosis of rTEF or AL (day)	BW at diagnosis of rTEF or AL (kg)	GER	AS	Age (day)	BW (kg)	Details of surgery and results
1	F	38	2014	-	C	1	1	2	Primary repair	rTEF	4	2	+	-	420	6.4	rTEF division → 2nd rTEF → CE → re-anastomosis+fundoplication	+
2	F	38	2470	-	C	1.4	0	2.5	Primary repair	rTEF	55	3.3	+	+	222	7.6	rTEF division+re-anastomosis	+
3	M	40	2030	Prune-berry syndrome, Cloacal malformation	C	2.5	5	2	Primary repair	rTEF	173	3.1	+	-	243	4.1	rTEF division	+
4	F	33	1828	DORV, NRDS	C	2	5	1.6	Primary repair	rTEF	258	4.9	+	+	560	8.3	rTEF division+re-anastomosis	+
5	F	32	1872	21 trisomy	A	5	213	7.5	Staged repair (Gastrostomy+Haward procedure)	AL	218	7.5	+	-	420	9.3	Re-anastomosis	+
6	F	37	2118	Neonatal asphyxia	C	1.1	469	8.3	Staged repair (Gastrostomy+CE+TEF division)	AL	476	8.3	+	-	476	8.3	CE → re-anastomosis	-
Abbreviations: BW, body weight; rTEF, recurrent tracheoesophageal fistula; AL, anastomotic leak; GER, gastroesophageal reflux; AS, anastomotic stricture; CE, cervical esophagostomy; DORV, double outlet right venticle; NRDS, neonatal respiratory distress syndrome

## Sheet: Table 2
Table 2 Comparison between reoperation and non-reoperation groups
			Reoperation group (n=6)		Non-reoperation group (n=28)		p value
Sex	Male	n (%)	1	(16.7)	22	(78.6)
	Female	n (%)	5	(83.3)	6	(21.4)	<0.01*
Gestational age (week)		median (range)	37.9	(32.7-40.1)	38.1	(34.4-41.3)	0.416
Birth weight (g)		median (range)	2010	(1828-2470)	2580	(1875-3349)	<0.01*
Neonatal asphyxia		n (%)	1	(16.7)	2	(7.1)	0.453
Gross type	A	n (%)	1	(16.7)	3	(10.7)
	C	n (%)	5	(83.3)	25	(89.3)	0.559
Associated anomalies	Non-syndromic	n (%)	5	(83.3)	22	(78.6)	1
	VACTERL association	n (%)	0	(0.0)	6	(21.4)	0.562
	21 trisomy	n (%)	1	(16.7)	0	(0.0)	0.176
	Congenital heart defects	n (%)	2	(33.3)	6	(21.4)	0.609
Age at first esophageal repair (day)		median (range)	5	(0-212)	1	(0-518)	0.168
Operation time (min)		median (range)	232	(143-490)	230	(134-569)	0.852
Length of gap (cm)		median (range)	1.7	(1.0-5.0)	1.6	(0.5-4.2)	0.928
Staged repair (esophageal lengthening)		n (%)	3	(50.0)	4	(14.3)	0.086
Anastomotic leak		n (%)	2	(33.3)	3	(10.7)	0.205
Reccurenct tracheoesophageal fistula		n (%)	4	(66.6)	1	(3.6)	<0.005*
Gastroesophageal reflux		n (%)	6	(100.0)	19	(67.9)	0.162
Anastomotic stricture		n (%)	2	(33.3)	11	(39.3)	1
Days until starting enteral nutrition from first esophageal repair (day)		median (range)	8.5	(3-16)	4.5	(1-14)	0.132
Hospital stay (day)		median (range)	637	(49-901)	75	(21-498)	<0.01*
Follow-up period (month)		median (range)	122	(22-186)	57.5	(1-151)	0.19
Neurodevelopmental delay		n (%)	5	(83.3)	4	(14.3)	<0.005*
VACTERL, vertical anomalies, anal atresia, cardiac defects, tracheoesophageal fistula, esophageal atresia, renal anomalies, limb defects
*p value of < 0.05 was considered to indicate statistical significance
